# Supplementary material for: Comparative Phylogeography, Historical Demography, and Population Genetics of Three Common Coastal Fauna in Spartina Marshes of the Northwestern Gulf of Mexico
Source: MDPI journal article supplement (doi:10.3390/d15060792), 2023-06-19
Supplement: s1 [file s1]

**Supplemental Table 1** Haplotype frequencies by sampling location for Gulf Killifish (*F. grandis*), Daggerblade grass shrimp (*P. pugio*), and Phloem-feeding planthoppers (*P. marginata*). Haplotype data for Gulf Killifish is shown for 366 bp of Control Region 1 (CR1), 344 bp of Nitrogen Dehydrogenase Subunit 2 (ND-2), 397 bp of Nitrogen Dehydrogenase Subunit 5 (ND-5) and 1077 bp of Concatenated sequence. Haplotype data for grass shrimp and planthoppers is shown for 466 bp of 16s RNA, and for 372 bp of Cytochrome Oxidase Subunit I (COI), respectively.

| Haplotype                                 | Corpus Christi | Matagorda | Reitan Marsh | Sportsman's | Venice | Ocean Springs | Accession |
|-------------------------------------------|----------------|-----------|--------------|-------------|--------|---------------|-----------|
| <b><i>F. grandis</i> Control Region 1</b> |                |           |              |             |        |               |           |
| CR1 – 01                                  | 5              | 0         | 0            | 0           | 0      | 0             | MT622370  |
| CR1 – 02                                  | 2              | 3         | 0            | 0           | 0      | 0             | MT622371  |
| CR1 – 03                                  | 9              | 0         | 0            | 0           | 0      | 0             | MT622372  |
| CR1 – 04                                  | 2              | 0         | 0            | 0           | 0      | 0             | MT622373  |
| CR1 – 05                                  | 1              | 0         | 0            | 0           | 0      | 0             | MT622374  |
| CR1 – 06                                  | 1              | 0         | 3            | 1           | 0      | 0             | MT622375  |
| CR1 – 07                                  | 1              | 0         | 0            | 0           | 0      | 0             | MT622376  |
| CR1 – 08                                  | 2              | 0         | 0            | 0           | 0      | 0             | MT622377  |
| CR1 – 09                                  | 1              | 0         | 0            | 0           | 0      | 0             | MT622378  |
| CR1 – 10                                  | 1              | 1         | 0            | 2           | 0      | 0             | MT622379  |
| CR1 – 11                                  | 1              | 3         | 2            | 0           | 0      | 0             | MT622380  |
| CR1 – 12                                  | 0              | 1         | 2            | 3           | 0      | 0             | MT622381  |
| CR1 – 13                                  | 0              | 1         | 0            | 0           | 0      | 0             | MT622382  |
| CR1 – 14                                  | 0              | 1         | 0            | 0           | 0      | 0             | MT622383  |
| CR1 – 15                                  | 0              | 1         | 0            | 1           | 0      | 0             | MT622384  |
| CR1 – 16                                  | 0              | 2         | 1            | 1           | 0      | 0             | MT622385  |
| CR1 – 17                                  | 0              | 1         | 0            | 0           | 0      | 0             | MT622386  |
| CR1 – 18                                  | 0              | 1         | 2            | 1           | 0      | 0             | MT622387  |
| CR1 – 19                                  | 0              | 1         | 0            | 0           | 0      | 0             | MT622388  |
| CR1 – 20                                  | 0              | 1         | 5            | 2           | 0      | 0             | MT622389  |
| CR1 – 21                                  | 0              | 1         | 0            | 0           | 0      | 0             | MT622390  |
| CR1 – 22                                  | 0              | 0         | 0            | 0           | 17     | 13            | MT622391  |
| CR1 – 23                                  | 0              | 0         | 0            | 0           | 0      | 1             | MT622392  |
| CR1 – 24                                  | 0              | 0         | 0            | 0           | 0      | 2             | MT622393  |
| CR1 – 25                                  | 0              | 0         | 0            | 0           | 0      | 2             | MT622394  |
| CR1 – 26                                  | 0              | 0         | 0            | 0           | 6      | 3             | MT622395  |
| CR1 – 27                                  | 0              | 0         | 0            | 0           | 2      | 1             | MT622396  |
| CR1 – 28                                  | 0              | 0         | 0            | 0           | 0      | 1             | MT622397  |
| CR1 – 29                                  | 0              | 0         | 0            | 0           | 0      | 1             | MT622398  |
| CR1 – 30                                  | 0              | 0         | 0            | 0           | 0      | 1             | MT622399  |
| CR1 – 31                                  | 0              | 0         | 0            | 0           | 0      | 1             | MT622400  |
| CR1 – 32                                  | 0              | 0         | 0            | 0           | 0      | 1             | MT622401  |

| Haplotype                                                 | Corpus Christi | Matagorda | Reitan Marsh | Sportsman's | Venice | Ocean Springs | Accession |
|-----------------------------------------------------------|----------------|-----------|--------------|-------------|--------|---------------|-----------|
| <b><i>F. grandis</i> Control Region 1 – Cont'd</b>        |                |           |              |             |        |               |           |
| CR1 – 33                                                  | 0              | 0         | 0            | 0           | 0      | 1             | MT622402  |
| CR1 – 34                                                  | 0              | 0         | 0            | 0           | 0      | 1             | MT622403  |
| CR1 – 35                                                  | 0              | 0         | 0            | 0           | 0      | 1             | MT622404  |
| CR1 – 36                                                  | 0              | 0         | 0            | 0           | 0      | 1             | MT622405  |
| CR1 – 37                                                  | 0              | 0         | 0            | 0           | 0      | 1             | MT622406  |
| CR1 – 38                                                  | 0              | 0         | 0            | 0           | 0      | 1             | MT622407  |
| CR1 – 39                                                  | 0              | 0         | 1            | 0           | 0      | 0             | MT622408  |
| CR1 – 40                                                  | 0              | 0         | 1            | 0           | 0      | 0             | MT622409  |
| CR1 – 41                                                  | 0              | 0         | 1            | 0           | 0      | 0             | MT622410  |
| CR1 – 42                                                  | 0              | 0         | 2            | 0           | 0      | 0             | MT622411  |
| CR1 – 43                                                  | 0              | 0         | 1            | 0           | 0      | 0             | MT622412  |
| CR1 – 44                                                  | 0              | 0         | 1            | 1           | 0      | 0             | MT622413  |
| CR1 – 45                                                  | 0              | 0         | 1            | 0           | 0      | 0             | MT622414  |
| CR1 – 46                                                  | 0              | 0         | 2            | 1           | 0      | 0             | MT622415  |
| CR1 – 47                                                  | 0              | 0         | 1            | 0           | 0      | 0             | MT622416  |
| CR1 – 48                                                  | 0              | 0         | 1            | 0           | 0      | 0             | MT622417  |
| CR1 – 49                                                  | 0              | 0         | 1            | 0           | 0      | 0             | MT622418  |
| CR1 – 50                                                  | 0              | 0         | 1            | 0           | 0      | 0             | MT622419  |
| CR1 – 51                                                  | 0              | 0         | 0            | 3           | 0      | 0             | MT622420  |
| CR1 – 52                                                  | 0              | 0         | 0            | 1           | 0      | 0             | MT622421  |
| CR1 – 53                                                  | 0              | 0         | 0            | 1           | 0      | 0             | MT622422  |
| CR1 – 54                                                  | 0              | 0         | 0            | 1           | 0      | 0             | MT622423  |
| CR1 – 55                                                  | 0              | 0         | 0            | 1           | 0      | 0             | MT622424  |
| CR1 – 56                                                  | 0              | 0         | 0            | 1           | 0      | 0             | MT622425  |
| CR1 – 57                                                  | 0              | 0         | 0            | 1           | 0      | 0             | MT622426  |
| CR1 – 58                                                  | 0              | 0         | 0            | 1           | 0      | 0             | MT622427  |
| CR1 – 59                                                  | 0              | 0         | 0            | 1           | 0      | 0             | MT622428  |
| CR1 – 60                                                  | 0              | 0         | 0            | 1           | 0      | 0             | MT622429  |
| CR1 – 61                                                  | 0              | 0         | 0            | 1           | 0      | 0             | MT622430  |
| CR1 – 62                                                  | 0              | 0         | 0            | 1           | 0      | 0             | MT622431  |
| CR1 – 63                                                  | 0              | 0         | 0            | 0           | 2      | 0             | MT622432  |
| CR1 – 64                                                  | 0              | 0         | 0            | 0           | 1      | 0             | MT622433  |
| CR1 – 65                                                  | 0              | 0         | 0            | 0           | 1      | 0             | MT622434  |
| CR1 – 66                                                  | 0              | 0         | 0            | 0           | 1      | 0             | MT622435  |
| CR1 – 67                                                  | 0              | 0         | 0            | 0           | 1      | 0             | MT622436  |
| CR1 – 68                                                  | 0              | 0         | 0            | 0           | 1      | 0             | MT622437  |
| CR1 – 69                                                  | 0              | 0         | 0            | 0           | 1      | 0             | MT622438  |
| CR1 – 70                                                  | 0              | 0         | 0            | 0           | 1      | 0             | MT622439  |
| CR1 – 71                                                  | 0              | 0         | 0            | 0           | 1      | 0             | MT622440  |
| CR1 – 72                                                  | 0              | 0         | 0            | 0           | 1      | 0             | MT622441  |
| <b><i>F. grandis</i> Nitrogen Dehydrogenase Subunit 2</b> |                |           |              |             |        |               |           |
| ND2 – 01                                                  | 5              | 3         | 5            | 1           | 0      | 0             | MT622442  |
| ND2 – 02                                                  | 2              | 2         | 0            | 0           | 0      | 0             | MT622443  |
| ND2 – 03                                                  | 4              | 0         | 0            | 0           | 0      | 0             | MT622444  |

| Haplotype                                                   | Corpus Christi | Matagorda | Reitan Marsh | Sportsman's | Venice | Ocean Springs | Accession |
|-------------------------------------------------------------|----------------|-----------|--------------|-------------|--------|---------------|-----------|
| <i>F. grandis</i> Nitrogen Dehydrogenase Subunit 2 – Cont'd |                |           |              |             |        |               |           |
| ND2 – 04                                                    | 6              | 0         | 0            | 0           | 0      | 0             | MT622445  |
| ND2 – 05                                                    | 2              | 0         | 0            | 0           | 0      | 0             | MT622446  |
| ND2 – 06                                                    | 1              | 1         | 0            | 0           | 0      | 0             | MT622447  |
| ND2 – 07                                                    | 1              | 0         | 3            | 0           | 0      | 0             | MT622448  |
| ND2 – 08                                                    | 1              | 0         | 1            | 0           | 0      | 0             | MT622449  |
| ND2 – 09                                                    | 1              | 0         | 0            | 0           | 0      | 0             | MT622450  |
| ND2 – 10                                                    | 2              | 0         | 0            | 0           | 0      | 0             | MT622451  |
| ND2 – 11                                                    | 1              | 3         | 5            | 3           | 1      | 5             | MT622452  |
| ND2 – 12                                                    | 0              | 1         | 0            | 0           | 0      | 0             | MT622453  |
| ND2 – 13                                                    | 0              | 1         | 0            | 0           | 0      | 0             | MT622454  |
| ND2 – 14                                                    | 0              | 1         | 0            | 1           | 0      | 0             | MT622455  |
| ND2 – 15                                                    | 0              | 1         | 0            | 0           | 0      | 0             | MT622456  |
| ND2 – 16                                                    | 0              | 1         | 3            | 2           | 0      | 0             | MT622457  |
| ND2 – 17                                                    | 0              | 1         | 0            | 0           | 0      | 0             | MT622458  |
| ND2 – 18                                                    | 0              | 1         | 0            | 0           | 0      | 0             | MT622459  |
| ND2 – 19                                                    | 0              | 1         | 0            | 0           | 0      | 0             | MT622460  |
| ND2 – 20                                                    | 0              | 1         | 1            | 1           | 0      | 0             | MT622461  |
| ND2 – 21                                                    | 0              | 0         | 0            | 0           | 13     | 4             | MT622462  |
| ND2 – 22                                                    | 0              | 0         | 0            | 0           | 0      | 1             | MT622463  |
| ND2 – 23                                                    | 0              | 0         | 0            | 0           | 0      | 6             | MT622464  |
| ND2 – 24                                                    | 0              | 0         | 0            | 0           | 0      | 1             | MT622465  |
| ND2 – 25                                                    | 0              | 0         | 0            | 0           | 0      | 2             | MT622466  |
| ND2 – 26                                                    | 0              | 0         | 0            | 0           | 0      | 1             | MT622467  |
| ND2 – 27                                                    | 0              | 0         | 0            | 0           | 0      | 1             | MT622468  |
| ND2 – 28                                                    | 0              | 0         | 0            | 0           | 11     | 4             | MT622469  |
| ND2 – 29                                                    | 0              | 0         | 0            | 0           | 0      | 1             | MT622470  |
| ND2 – 30                                                    | 0              | 0         | 0            | 0           | 0      | 1             | MT622471  |
| ND2 – 31                                                    | 0              | 0         | 0            | 0           | 0      | 1             | MT622472  |
| ND2 – 32                                                    | 0              | 0         | 0            | 0           | 0      | 1             | MT622473  |
| ND2 – 33                                                    | 0              | 0         | 0            | 0           | 5      | 1             | MT622474  |
| ND2 – 34                                                    | 0              | 0         | 0            | 0           | 0      | 1             | MT622475  |
| ND2 – 35                                                    | 0              | 0         | 0            | 0           | 0      | 1             | MT622476  |
| ND2 – 36                                                    | 0              | 0         | 0            | 0           | 0      | 1             | MT622477  |
| ND2 – 37                                                    | 0              | 0         | 1            | 0           | 0      | 0             | MT622478  |
| ND2 – 38                                                    | 0              | 0         | 2            | 3           | 0      | 0             | MT622479  |
| ND2 – 39                                                    | 0              | 0         | 2            | 1           | 0      | 0             | MT622480  |
| ND2 – 40                                                    | 0              | 0         | 2            | 1           | 0      | 0             | MT622481  |
| ND2 – 41                                                    | 0              | 0         | 1            | 0           | 0      | 0             | MT622482  |
| ND2 – 42                                                    | 0              | 0         | 1            | 0           | 0      | 0             | MT622483  |
| ND2 – 43                                                    | 0              | 0         | 1            | 1           | 0      | 0             | MT622484  |
| ND2 – 44                                                    | 0              | 0         | 1            | 1           | 0      | 0             | MT622485  |
| ND2 – 45                                                    | 0              | 0         | 0            | 3           | 0      | 0             | MT622486  |
| ND2 – 46                                                    | 0              | 0         | 0            | 1           | 0      | 0             | MT622487  |
| ND2 – 47                                                    | 0              | 0         | 0            | 3           | 0      | 0             | MT622488  |

| Haplotype                                                          | Corpus Christi | Matagorda | Reitan Marsh | Sportsman's | Venice | Ocean Springs | Accession |
|--------------------------------------------------------------------|----------------|-----------|--------------|-------------|--------|---------------|-----------|
| <b><i>F. grandis</i> Nitrogen Dehydrogenase Subunit 2 – Cont'd</b> |                |           |              |             |        |               |           |
| ND2 – 48                                                           | 0              | 0         | 0            | 2           | 0      | 0             | MT622489  |
| ND2 – 49                                                           | 0              | 0         | 0            | 1           | 0      | 0             | MT622490  |
| ND2 – 50                                                           | 0              | 0         | 0            | 1           | 0      | 0             | MT622491  |
| ND2 – 51                                                           | 0              | 0         | 0            | 1           | 0      | 0             | MT622492  |
| ND2 – 52                                                           | 0              | 0         | 0            | 0           | 3      | 0             | MT622493  |
| ND2 – 53                                                           | 0              | 0         | 0            | 0           | 1      | 0             | MT622494  |
| ND2 – 54                                                           | 0              | 0         | 0            | 0           | 1      | 0             | MT622495  |
| ND2 – 55                                                           | 0              | 0         | 0            | 0           | 1      | 0             | MT622496  |
| <b><i>F. grandis</i> Nitrogen Dehydrogenase Subunit 5</b>          |                |           |              |             |        |               |           |
| ND5 – 01                                                           | 10             | 5         | 8            | 5           | 0      | 0             | MT635859  |
| ND5 – 02                                                           | 2              | 0         | 0            | 0           | 0      | 0             | MT635860  |
| ND5 – 03                                                           | 8              | 0         | 0            | 0           | 0      | 0             | MT635861  |
| ND5 – 04                                                           | 2              | 0         | 0            | 0           | 0      | 0             | MT635862  |
| ND5 – 05                                                           | 1              | 1         | 1            | 2           | 0      | 0             | MT635863  |
| ND5 – 06                                                           | 1              | 0         | 4            | 1           | 0      | 0             | MT635864  |
| ND5 – 07                                                           | 1              | 1         | 1            | 1           | 0      | 0             | MT635865  |
| ND5 – 08                                                           | 1              | 0         | 0            | 0           | 0      | 0             | MT635866  |
| ND5 – 09                                                           | 0              | 1         | 0            | 2           | 0      | 0             | MT635867  |
| ND5 – 10                                                           | 0              | 1         | 0            | 0           | 0      | 0             | MT635868  |
| ND5 – 11                                                           | 0              | 1         | 0            | 0           | 0      | 0             | MT635869  |
| ND5 – 12                                                           | 0              | 1         | 0            | 0           | 0      | 0             | MT635870  |
| ND5 – 13                                                           | 0              | 1         | 0            | 0           | 0      | 0             | MT635871  |
| ND5 – 14                                                           | 0              | 1         | 2            | 1           | 0      | 0             | MT635872  |
| ND5 – 15                                                           | 0              | 1         | 1            | 1           | 0      | 0             | MT635873  |
| ND5 – 16                                                           | 0              | 1         | 0            | 0           | 0      | 0             | MT635874  |
| ND5 – 17                                                           | 0              | 1         | 0            | 0           | 0      | 0             | MT635875  |
| ND5 – 18                                                           | 0              | 1         | 0            | 0           | 0      | 0             | MT635876  |
| ND5 – 19                                                           | 0              | 1         | 0            | 2           | 0      | 0             | MT635877  |
| ND5 – 20                                                           | 0              | 0         | 0            | 0           | 22     | 17            | MT635878  |
| ND5 – 21                                                           | 0              | 0         | 0            | 0           | 0      | 1             | MT635879  |
| ND5 – 22                                                           | 0              | 0         | 0            | 0           | 2      | 5             | MT635880  |
| ND5 – 23                                                           | 0              | 0         | 0            | 0           | 0      | 1             | MT635881  |
| ND5 – 24                                                           | 0              | 0         | 0            | 0           | 0      | 1             | MT635882  |
| ND5 – 25                                                           | 0              | 0         | 0            | 0           | 0      | 1             | MT635883  |
| ND5 – 26                                                           | 0              | 0         | 0            | 0           | 7      | 2             | MT635884  |
| ND5 – 27                                                           | 0              | 0         | 0            | 0           | 0      | 1             | MT635885  |
| ND5 – 28                                                           | 0              | 0         | 0            | 0           | 0      | 1             | MT635886  |
| ND5 – 29                                                           | 0              | 0         | 0            | 0           | 0      | 1             | MT635887  |
| ND5 – 30                                                           | 0              | 0         | 0            | 0           | 0      | 1             | MT635888  |
| ND5 – 31                                                           | 0              | 0         | 0            | 0           | 1      | 1             | MT635889  |
| ND5 – 32                                                           | 0              | 0         | 1            | 0           | 0      | 0             | MT635890  |
| ND5 – 33                                                           | 0              | 0         | 1            | 0           | 0      | 0             | MT635891  |
| ND5 – 34                                                           | 0              | 0         | 2            | 3           | 0      | 0             | MT635892  |
| ND5 – 35                                                           | 0              | 0         | 1            | 0           | 0      | 0             | MT635893  |

| Haplotype                                                          | Corpus Christi | Matagorda | Reitan Marsh | Sportsman's | Venice | Ocean Springs | Accession                          |
|--------------------------------------------------------------------|----------------|-----------|--------------|-------------|--------|---------------|------------------------------------|
| <b><i>F. grandis</i> Nitrogen Dehydrogenase Subunit 5 – Cont'd</b> |                |           |              |             |        |               |                                    |
| ND5 – 36                                                           | 0              | 0         | 1            | 0           | 0      | 0             | MT635894                           |
| ND5 – 37                                                           | 0              | 0         | 1            | 0           | 0      | 0             | MT635895                           |
| ND5 – 38                                                           | 0              | 0         | 1            | 1           | 0      | 0             | MT635896                           |
| ND5 – 39                                                           | 0              | 0         | 1            | 0           | 0      | 0             | MT635897                           |
| ND5 – 40                                                           | 0              | 0         | 2            | 0           | 0      | 0             | MT635898                           |
| ND5 – 41                                                           | 0              | 0         | 1            | 2           | 0      | 0             | MT635899                           |
| ND5 – 42                                                           | 0              | 0         | 0            | 2           | 0      | 0             | MT635900                           |
| ND5 – 43                                                           | 0              | 0         | 0            | 1           | 0      | 0             | MT635901                           |
| ND5 – 44                                                           | 0              | 0         | 0            | 1           | 0      | 0             | MT635902                           |
| ND5 – 45                                                           | 0              | 0         | 0            | 1           | 0      | 0             | MT635903                           |
| ND5 – 46                                                           | 0              | 0         | 0            | 1           | 0      | 0             | MT635904                           |
| ND5 – 47                                                           | 0              | 0         | 0            | 0           | 1      | 0             | MT635905                           |
| ND5 – 48                                                           | 0              | 0         | 0            | 0           | 1      | 0             | MT635906                           |
| ND5 – 49                                                           | 0              | 0         | 0            | 0           | 1      | 0             | MT635907                           |
| ND5 – 50                                                           | 0              | 0         | 0            | 0           | 1      | 0             | MT635908                           |
| <b><i>F. grandis</i> Concatenated Sequences</b>                    |                |           |              |             |        |               |                                    |
| Con – 001                                                          | 4              | 0         | 0            | 0           | 0      | 0             | MT622370,<br>MT622442,<br>MT635859 |
| Con – 002                                                          | 2              | 0         | 0            | 0           | 0      | 0             | MT622371,<br>MT622443,<br>MT635860 |
| Con – 003                                                          | 4              | 0         | 0            | 0           | 0      | 0             | MT622372,<br>MT622444,<br>MT635861 |
| Con – 004                                                          | 2              | 0         | 0            | 0           | 0      | 0             | MT622372,<br>MT622445,<br>MT635862 |
| Con – 005                                                          | 2              | 0         | 0            | 0           | 0      | 0             | MT622373,<br>MT622445,<br>MT635862 |
| Con – 006                                                          | 1              | 0         | 0            | 0           | 0      | 0             | MT622374,<br>MT622447,<br>MT635863 |
| Con – 007                                                          | 3              | 0         | 0            | 0           | 0      | 0             | MT622372,<br>MT622445,<br>MT635861 |
| Con – 008                                                          | 1              | 0         | 2            | 0           | 0      | 0             | MT622375,<br>MT622448,<br>MT635864 |
| Con – 009                                                          | 1              | 0         | 0            | 0           | 0      | 0             | MT622370,<br>MT622449,<br>MT635859 |
| Con – 010                                                          | 1              | 0         | 0            | 0           | 0      | 0             | MT622376,<br>MT622450,<br>MT635859 |
| Con – 011                                                          | 1              | 0         | 0            | 0           | 0      | 0             | MT622377,<br>MT622451,<br>MT635859 |

| Haplotype                                                | Corpus Christi | Matagorda | Reitan Marsh | Sportsman's | Venice | Ocean Springs | Accession                          |
|----------------------------------------------------------|----------------|-----------|--------------|-------------|--------|---------------|------------------------------------|
| <b><i>F. grandis</i> Concatenated Sequences – Cont'd</b> |                |           |              |             |        |               |                                    |
| Con – 012                                                | 1              | 0         | 0            | 0           | 0      | 0             | MT622378,<br>MT622445,<br>MT635861 |
| Con – 013                                                | 1              | 0         | 0            | 0           | 0      | 0             | MT622379,<br>MT622452,<br>MT635865 |
| Con – 014                                                | 1              | 3         | 1            | 0           | 0      | 0             | MT622380,<br>MT622442,<br>MT635859 |
| Con – 015                                                | 1              | 0         | 0            | 0           | 0      | 0             | MT622377,<br>MT622451,<br>MT635866 |
| Con – 016                                                | 0              | 0         | 1            | 0           | 0      | 0             | MT622408,<br>MT622478,<br>MT635890 |
| Con – 017                                                | 0              | 0         | 1            | 0           | 0      | 0             | MT622409,<br>MT622461,<br>MT635859 |
| Con – 018                                                | 0              | 0         | 1            | 0           | 0      | 0             | MT622410,<br>MT622452,<br>MT635891 |
| Con – 019                                                | 0              | 0         | 2            | 0           | 0      | 0             | MT622411,<br>MT622442,<br>MT635859 |
| Con – 020                                                | 0              | 0         | 2            | 3           | 0      | 0             | MT622381,<br>MT622479,<br>MT635892 |
| Con – 021                                                | 0              | 0         | 1            | 0           | 0      | 0             | MT622412,<br>MT622452,<br>MT635893 |
| Con – 022                                                | 0              | 0         | 1            | 0           | 0      | 0             | MT622375,<br>MT622442,<br>MT635864 |
| Con – 023                                                | 0              | 0         | 1            | 1           | 0      | 0             | MT622413,<br>MT622480,<br>MT635859 |
| Con – 024                                                | 0              | 0         | 1            | 1           | 0      | 0             | MT622389,<br>MT622452,<br>MT635865 |
| Con – 025                                                | 0              | 0         | 1            | 0           | 0      | 0             | MT622414,<br>MT622480,<br>MT635859 |
| Con – 026                                                | 0              | 0         | 2            | 1           | 0      | 0             | MT622415,<br>MT622481,<br>MT635859 |
| Con – 027                                                | 0              | 0         | 1            | 0           | 0      | 0             | MT622389,<br>MT622452,<br>MT635863 |
| Con – 028                                                | 0              | 0         | 1            | 0           | 0      | 0             | MT622385,<br>MT622482,<br>MT635894 |

| Haplotype                                                | Corpus Christi | Matagorda | Reitan Marsh | Sportsman's | Venice | Ocean Springs | Accession                          |
|----------------------------------------------------------|----------------|-----------|--------------|-------------|--------|---------------|------------------------------------|
| <b><i>F. grandis</i> Concatenated Sequences – Cont'd</b> |                |           |              |             |        |               |                                    |
| Con – 029                                                | 0              | 0         | 1            | 0           | 0      | 0             | MT622416,<br>MT622449,<br>MT635873 |
| Con – 030                                                | 0              | 0         | 1            | 0           | 0      | 0             | MT622417,<br>MT622483,<br>MT635859 |
| Con – 031                                                | 0              | 1         | 2            | 1           | 0      | 0             | MT622387,<br>MT622457,<br>MT635873 |
| Con – 032                                                | 0              | 0         | 1            | 0           | 0      | 0             | MT622418,<br>MT622448,<br>MT635895 |
| Con – 033                                                | 0              | 0         | 1            | 1           | 0      | 0             | MT622389,<br>MT622484,<br>MT635896 |
| Con – 034                                                | 0              | 0         | 1            | 0           | 0      | 0             | MT622419,<br>MT622452,<br>MT635897 |
| Con – 035                                                | 0              | 0         | 1            | 0           | 0      | 0             | MT622389,<br>MT622457,<br>MT635898 |
| Con – 036                                                | 0              | 0         | 1            | 0           | 0      | 0             | MT622389,<br>MT622485,<br>MT635898 |
| Con – 037                                                | 0              | 0         | 1            | 0           | 0      | 0             | MT622380,<br>MT622442,<br>MT635864 |
| Con – 038                                                | 0              | 0         | 0            | 1           | 0      | 0             | MT622420,<br>MT622485,<br>MT635899 |
| Con – 039                                                | 0              | 0         | 0            | 1           | 0      | 0             | MT622421,<br>MT622486,<br>MT635900 |
| Con – 040                                                | 0              | 0         | 0            | 1           | 0      | 0             | MT622375,<br>MT622487,<br>MT635864 |
| Con – 041                                                | 0              | 1         | 0            | 0           | 0      | 0             | MT622381,<br>MT622452,<br>MT635859 |
| Con – 042                                                | 0              | 1         | 0            | 0           | 0      | 0             | MT622371,<br>MT622443,<br>MT635867 |
| Con – 043                                                | 0              | 0         | 0            | 0           | 1      | 0             | MT622432,<br>MT622493,<br>MT635880 |
| Con – 044                                                | 0              | 0         | 0            | 0           | 4      | 0             | MT622395,<br>MT622474,<br>MT635884 |
| Con – 045                                                | 0              | 0         | 0            | 0           | 10     | 2             | MT622391,<br>MT622462,<br>MT635878 |

| Haplotype                                                | Corpus Christi | Matagorda | Reitan Marsh | Sportsman's | Venice | Ocean Springs | Accession                          |
|----------------------------------------------------------|----------------|-----------|--------------|-------------|--------|---------------|------------------------------------|
| <b><i>F. grandis</i> Concatenated Sequences – Cont'd</b> |                |           |              |             |        |               |                                    |
| Con – 046                                                | 0              | 0         | 0            | 0           | 1      | 0             | MT622433,<br>MT622493,<br>MT635880 |
| Con – 047                                                | 0              | 0         | 0            | 0           | 1      | 0             | MT622396,<br>MT622494,<br>MT635905 |
| Con – 048                                                | 0              | 0         | 0            | 0           | 1      | 0             | MT622432,<br>MT622493,<br>MT635884 |
| Con – 049                                                | 0              | 0         | 0            | 0           | 7      | 3             | MT622391,<br>MT622469,<br>MT635878 |
| Con – 050                                                | 0              | 0         | 0            | 0           | 1      | 0             | MT622396,<br>MT622495,<br>MT635878 |
| Con – 051                                                | 0              | 0         | 0            | 0           | 1      | 0             | MT622434,<br>MT622469,<br>MT635878 |
| Con – 052                                                | 0              | 0         | 0            | 0           | 1      | 0             | MT622435,<br>MT622452,<br>MT635906 |
| Con – 053                                                | 0              | 0         | 0            | 0           | 1      | 0             | MT622436,<br>MT622474,<br>MT635884 |
| Con – 054                                                | 0              | 0         | 0            | 0           | 1      | 0             | MT622437,<br>MT622469,<br>MT635878 |
| Con – 055                                                | 0              | 0         | 0            | 0           | 1      | 0             | MT622395,<br>MT622462,<br>MT635889 |
| Con – 056                                                | 0              | 0         | 0            | 0           | 1      | 0             | MT622438,<br>MT622469,<br>MT635907 |
| Con – 057                                                | 0              | 0         | 0            | 0           | 1      | 0             | MT622439,<br>MT622462,<br>MT635878 |
| Con – 058                                                | 0              | 0         | 0            | 0           | 1      | 0             | MT622440,<br>MT622469,<br>MT635908 |
| Con – 059                                                | 0              | 0         | 0            | 0           | 1      | 0             | MT622395,<br>MT622496,<br>MT635884 |
| Con – 060                                                | 0              | 0         | 0            | 0           | 1      | 0             | MT622441,<br>MT622462,<br>MT635878 |
| Con – 061                                                | 0              | 0         | 0            | 0           | 0      | 1             | MT622392,<br>MT622463,<br>MT635879 |
| Con – 062                                                | 0              | 0         | 0            | 0           | 0      | 3             | MT622391,<br>MT622464,<br>MT635878 |

| Haplotype                                                | Corpus Christi | Matagorda | Reitan Marsh | Sportsman's | Venice | Ocean Springs | Accession                          |
|----------------------------------------------------------|----------------|-----------|--------------|-------------|--------|---------------|------------------------------------|
| <b><i>F. grandis</i> Concatenated Sequences – Cont'd</b> |                |           |              |             |        |               |                                    |
| Con – 063                                                | 0              | 0         | 0            | 0           | 0      | 1             | MT622393,<br>MT622465,<br>MT635880 |
| Con – 064                                                | 0              | 0         | 0            | 0           | 0      | 2             | MT622394,<br>MT622452,<br>MT635880 |
| Con – 065                                                | 0              | 0         | 0            | 0           | 0      | 2             | MT622395,<br>MT622466,<br>MT635878 |
| Con – 066                                                | 0              | 0         | 0            | 0           | 0      | 1             | MT622396,<br>MT622452,<br>MT635881 |
| Con – 067                                                | 0              | 0         | 0            | 0           | 0      | 1             | MT622397,<br>MT622467,<br>MT635878 |
| Con – 068                                                | 0              | 0         | 0            | 0           | 0      | 1             | MT622398,<br>MT622468,<br>MT635880 |
| Con – 069                                                | 0              | 0         | 0            | 0           | 0      | 1             | MT622399,<br>MT622469,<br>MT635882 |
| Con – 070                                                | 0              | 0         | 0            | 0           | 0      | 1             | MT622400,<br>MT622470,<br>MT635878 |
| Con – 071                                                | 0              | 0         | 0            | 0           | 0      | 1             | MT622401,<br>MT622471,<br>MT635878 |
| Con – 072                                                | 0              | 0         | 0            | 0           | 0      | 1             | MT622402,<br>MT622464,<br>MT635878 |
| Con – 073                                                | 0              | 0         | 0            | 0           | 0      | 1             | MT622403,<br>MT622452,<br>MT635883 |
| Con – 074                                                | 0              | 0         | 0            | 0           | 0      | 1             | MT622404,<br>MT622464,<br>MT635878 |
| Con – 075                                                | 0              | 0         | 0            | 0           | 0      | 1             | MT622405,<br>MT622464,<br>MT635884 |
| Con – 076                                                | 0              | 0         | 0            | 0           | 0      | 1             | MT622393,<br>MT622452,<br>MT635880 |
| Con – 077                                                | 0              | 0         | 0            | 0           | 0      | 1             | MT622391,<br>MT622472,<br>MT635885 |
| Con – 078                                                | 0              | 0         | 0            | 0           | 0      | 1             | MT622391,<br>MT622473,<br>MT635886 |
| Con – 079                                                | 0              | 0         | 0            | 0           | 0      | 1             | MT622391,<br>MT622474,<br>MT635887 |

| Haplotype                                                | Corpus Christi | Matagorda | Reitan Marsh | Sportsman's | Venice | Ocean Springs | Accession                          |
|----------------------------------------------------------|----------------|-----------|--------------|-------------|--------|---------------|------------------------------------|
| <b><i>F. grandis</i> Concatenated Sequences – Cont'd</b> |                |           |              |             |        |               |                                    |
| Con – 080                                                | 0              | 0         | 0            | 0           | 0      | 1             | MT622406,<br>MT622475,<br>MT635888 |
| Con – 081                                                | 0              | 0         | 0            | 0           | 0      | 1             | MT622391,<br>MT622462,<br>MT635889 |
| Con – 082                                                | 0              | 0         | 0            | 0           | 0      | 1             | MT622407,<br>MT622462,<br>MT635878 |
| Con – 083                                                | 0              | 0         | 0            | 0           | 0      | 1             | MT622391,<br>MT622476,<br>MT635878 |
| Con – 084                                                | 0              | 0         | 0            | 0           | 0      | 1             | MT622395,<br>MT622477,<br>MT635884 |
| Con – 085                                                | 0              | 1         | 0            | 0           | 0      | 0             | MT622382,<br>MT622453,<br>MT635868 |
| Con – 086                                                | 0              | 1         | 0            | 0           | 0      | 0             | MT622383,<br>MT622454,<br>MT635869 |
| Con – 087                                                | 0              | 1         | 0            | 0           | 0      | 0             | MT622384,<br>MT622455,<br>MT635870 |
| Con – 088                                                | 0              | 1         | 0            | 0           | 0      | 0             | MT622385,<br>MT622452,<br>MT635871 |
| Con – 089                                                | 0              | 1         | 0            | 0           | 0      | 0             | MT622379,<br>MT622456,<br>MT635865 |
| Con – 090                                                | 0              | 1         | 0            | 0           | 0      | 0             | MT622386,<br>MT622447,<br>MT635872 |
| Con – 091                                                | 0              | 1         | 0            | 0           | 0      | 0             | MT622388,<br>MT622458,<br>MT635873 |
| Con – 092                                                | 0              | 1         | 0            | 0           | 0      | 0             | MT622389,<br>MT622459,<br>MT635874 |
| Con – 093                                                | 0              | 1         | 0            | 0           | 0      | 0             | MT622371,<br>MT622443,<br>MT635875 |
| Con – 094                                                | 0              | 1         | 0            | 0           | 0      | 0             | MT622371,<br>MT622460,<br>MT635876 |
| Con – 095                                                | 0              | 1         | 0            | 1           | 0      | 0             | MT622385,<br>MT622452,<br>MT635877 |
| Con – 096                                                | 0              | 1         | 0            | 0           | 0      | 0             | MT622390,<br>MT622461,<br>MT635859 |

|           |   |   |   |   |   |   |                                    |
|-----------|---|---|---|---|---|---|------------------------------------|
| Con – 097 | 0 | 0 | 0 | 1 | 0 | 0 | MT622422,<br>MT622488,<br>MT635867 |
| Con – 098 | 0 | 0 | 0 | 2 | 0 | 0 | MT622420,<br>MT622486,<br>MT635899 |
| Con – 099 | 0 | 0 | 0 | 2 | 0 | 0 | MT622379,<br>MT622489,<br>MT635863 |
| Con – 100 | 0 | 0 | 0 | 1 | 0 | 0 | MT622423,<br>MT622490,<br>MT635859 |
| Con – 101 | 0 | 0 | 0 | 1 | 0 | 0 | MT622424,<br>MT622457,<br>MT635873 |
| Con – 102 | 0 | 0 | 0 | 1 | 0 | 0 | MT622425,<br>MT622491,<br>MT635901 |
| Con – 103 | 0 | 0 | 0 | 1 | 0 | 0 | MT622426,<br>MT622488,<br>MT635902 |
| Con – 104 | 0 | 0 | 0 | 1 | 0 | 0 | MT622427,<br>MT622442,<br>MT635859 |
| Con – 105 | 0 | 0 | 0 | 1 | 0 | 0 | MT622428,<br>MT622461,<br>MT635903 |
| Con – 106 | 0 | 0 | 0 | 1 | 0 | 0 | MT622429,<br>MT622452,<br>MT635877 |
| Con – 107 | 0 | 0 | 0 | 1 | 0 | 0 | MT622430,<br>MT622488,<br>MT635867 |
| Con – 108 | 0 | 0 | 0 | 1 | 0 | 0 | MT622431,<br>MT622492,<br>MT635900 |
| Con – 109 | 0 | 0 | 0 | 1 | 0 | 0 | MT622384,<br>MT622455,<br>MT635904 |

| Haplotype                      | Pt.<br>Mansfield        | Matagorda         | Sportsman's | Pt.<br>Arthur   | Venice      | Ocean<br>Springs | Accession |
|--------------------------------|-------------------------|-------------------|-------------|-----------------|-------------|------------------|-----------|
| <b><i>P. pugio</i> 16sRNA</b>  |                         |                   |             |                 |             |                  |           |
| Ppug – 01                      | 0                       | 0                 | 20          | 0               | 0           | 0                | MT629892  |
| Ppug – 02                      | 20                      | 0                 | 0           | 0               | 5           | 6                | MT629893  |
| Ppug – 03                      | 0                       | 17                | 0           | 19              | 0           | 5                | MT629894  |
| Ppug – 04                      | 0                       | 1                 | 0           | 0               | 0           | 0                | MT629895  |
| Ppug – 05                      | 0                       | 1                 | 0           | 0               | 0           | 0                | MT629896  |
| Ppug – 06                      | 0                       | 1                 | 0           | 0               | 0           | 0                | MT629897  |
| Ppug – 07                      | 0                       | 0                 | 0           | 1               | 0           | 0                | MT629898  |
| Ppug – 08                      | 0                       | 0                 | 0           | 0               | 2           | 0                | MT629899  |
| Ppug – 09                      | 0                       | 0                 | 0           | 0               | 10          | 2                | MT629900  |
| Ppug – 10                      | 0                       | 0                 | 0           | 0               | 2           | 0                | MT629901  |
| Ppug – 11                      | 0                       | 0                 | 0           | 0               | 0           | 5                | MT629902  |
| Ppug – 12                      | 0                       | 0                 | 0           | 0               | 0           | 1                | MT629903  |
| Ppug – 13                      | 0                       | 0                 | 0           | 0               | 0           | 1                | MT629904  |
|                                |                         |                   |             |                 |             |                  |           |
|                                |                         |                   |             |                 |             |                  |           |
| Haplotype                      | South<br>Padre<br>Isle. | Corpus<br>Christi | Matagorda   | Reitan<br>Marsh | Sportsman's | Pt.<br>Arthur    | Accession |
| <b><i>P. marginata</i> COI</b> |                         |                   |             |                 |             |                  |           |
| Pmar – 01                      | 20                      | 14                | 14          | 24              | 18          | 17               | MT602510  |
| Pmar – 02                      | 0                       | 5                 | 6           | 0               | 0           | 0                | MT602511  |
| Pmar – 03                      | 0                       | 0                 | 0           | 0               | 2           | 2                | MT602512  |
| Pmar – 04                      | 0                       | 0                 | 0           | 0               | 1           | 1                | MT602513  |
