# Supplementary material for: Comparative Phylogeography, Historical Demography, and Population Genetics of Three Common Coastal Fauna in Spartina Marshes of the Northwestern Gulf of Mexico
Source: MDPI journal article supplement (doi:10.3390/d15060792), 2023-06-19
Supplement: s1 [file s1]

**Supplemental Figure S1.** Phylogeographic Association of *F. grandis* haplotypes. Haplotypes from the northwest Gulf of Mexico, inferred using concatenated sequences (1088 bp) of three mtDNA segments: Control Region, ND2, and ND5, are numerically identified with an acronym at the tip of the branches, and each individual carrying a specific haplotype is geographically identified with a color-coded symbol (see inset) corresponding to its locality of capture. Tree is the ML consensus of 1,000 trees, rooted using *F. heteroclitus* as an outgroup.
