# Supplementary material for: Comparative Phylogeography, Historical Demography, and Population Genetics of Three Common Coastal Fauna in Spartina Marshes of the Northwestern Gulf of Mexico
Source: MDPI journal article supplement (doi:10.3390/d15060792), 2023-06-19
Supplement: s1 [file s1]

**Supplemental Table 3.** Values for pairwise  $F_{ST}$  for 336 bp of CR1 for Gulf Killifish. Significant values are in bold, with significance at  $p < 0.05$  denoted by \*, and significance at  $p < 0.01$  denoted by \*\*.

|                | Corpus Christi    | Matagorda         | Reitan Marsh      | Sportsman's       | Venice    | Ocean Springs |
|----------------|-------------------|-------------------|-------------------|-------------------|-----------|---------------|
| Corpus Christi |                   |                   |                   |                   |           |               |
| Matagorda      | <b>0.13048 **</b> |                   |                   |                   |           |               |
| Reitan Marsh   | <b>0.12630 **</b> | - 0.02397         |                   |                   |           |               |
| Sportsman's    | <b>0.16789 **</b> | - 0.28040         | - 0.01095         |                   |           |               |
| Venice         | <b>0.55378 **</b> | <b>0.41388 **</b> | <b>0.37837 **</b> | <b>0.37176 **</b> |           |               |
| Ocean Springs  | <b>0.51352 **</b> | <b>0.36350 **</b> | <b>0.34385 **</b> | <b>0.33616 **</b> | - 0.00321 |               |

**Supplemental Table 4.** Values for pairwise population comparisons for 336 bp of CR1 for Gulf Killifish. Slatkin's linearized  $F_{ST}$  is above the diagonal, and Reynold's Distance is below the diagonal.

|                | Corpus Christi | Matagorda | Reitan Marsh | Sportsman's | Venice  | Ocean Springs |
|----------------|----------------|-----------|--------------|-------------|---------|---------------|
| Corpus Christi |                | 0.15006   | 0.14456      | 0.20176     | 1.24103 | 1.05560       |
| Matagorda      | 0.13981        |           | 0.00000      | 0.00000     | 0.70614 | 0.57108       |
| Reitan Marsh   | 0.13502        | 0.00000   |              | 0.00000     | 0.60868 | 0.52404       |
| Sportsman's    | 0.18379        | 0.00000   | 0.00000      |             | 0.59174 | 0.50638       |
| Venice         | 0.80694        | 0.53423   | 0.47541      | 0.46483     |         | 0.00000       |
| Ocean Springs  | 0.72057        | 0.45176   | 0.42136      | 0.40971     | 0.00000 |               |

**Supplemental Table 5.** Values for pairwise  $F_{ST}$  for 344 bp of ND2 for Gulf Killifish. Significant values are in bold, with significance at  $p < 0.05$  denoted by \*, and significance at  $p < 0.01$  denoted by \*\*.

|                | Corpus Christi    | Matagorda         | Reitan Marsh      | Sportsman's       | Venice            | Ocean Springs |
|----------------|-------------------|-------------------|-------------------|-------------------|-------------------|---------------|
| Corpus Christi |                   |                   |                   |                   |                   |               |
| Matagorda      | <b>0.18510 **</b> |                   |                   |                   |                   |               |
| Reitan Marsh   | <b>0.11354 **</b> | 0.00436           |                   |                   |                   |               |
| Sportsman's    | <b>0.16658 **</b> | - 0.01954         | - 0.00196         |                   |                   |               |
| Venice         | <b>0.67035 **</b> | <b>0.41758 **</b> | <b>0.49739 **</b> | <b>0.41995 **</b> |                   |               |
| Ocean Springs  | <b>0.63384 **</b> | <b>0.36811 **</b> | <b>0.46049 **</b> | <b>0.38327 **</b> | <b>0.10165 **</b> |               |

**Supplemental Table 6.** Values for pairwise population comparisons for 344 bp of ND2 for Gulf Killifish. Slatkin's linearized  $F_{ST}$  is above the diagonal, and Reynold's Distance is below the diagonal.

|                | Corpus Christi | Matagorda | Reitan Marsh | Sportsman's | Venice  | Ocean Springs |
|----------------|----------------|-----------|--------------|-------------|---------|---------------|
| Corpus Christi |                | 0.22714   | 0.12808      | 0.19988     | 2.03356 | 1.73107       |
| Matagorda      | 0.20469        |           | 0.00000      | 0.00000     | 0.71699 | 0.58256       |
| Reitan Marsh   | 0.12052        | 0.00000   |              | 0.00000     | 0.98963 | 0.85352       |
| Sportsman's    | 0.18222        | 0.00000   | 0.00000      |             | 0.72400 | 0.62147       |
| Venice         | 1.10974        | 0.54057   | 0.68795      | 0.54465     |         | 0.11315       |
| Ocean Springs  | 1.00469        | 0.45905   | 0.61709      | 0.48333     | 0.10719 |               |

**Supplemental Table 7.** Values for pairwise  $F_{ST}$  for 397 bp of ND5 for Gulf Killifish. Significant values are in bold, with significance at  $p < 0.05$  denoted by \*, and significance at  $p < 0.01$  denoted by \*\*.

|                | Corpus Christi    | Matagorda         | Reitan Marsh      | Sportsman's       | Venice  | Ocean Springs |
|----------------|-------------------|-------------------|-------------------|-------------------|---------|---------------|
| Corpus Christi |                   |                   |                   |                   |         |               |
| Matagorda      | <b>0.26557 **</b> |                   |                   |                   |         |               |
| Reitan Marsh   | <b>0.21357 **</b> | - 0.02293         |                   |                   |         |               |
| Sportsman's    | <b>0.23144 **</b> | - 0.35870         | - 0.02046         |                   |         |               |
| Venice         | <b>0.78959 **</b> | <b>0.43453 **</b> | <b>0.42580 **</b> | <b>0.40329 **</b> |         |               |
| Ocean Springs  | <b>0.75483 **</b> | <b>0.38376 **</b> | <b>0.38567 **</b> | <b>0.36170 **</b> | 0.02557 |               |

**Supplemental Table 8.** Values for pairwise population comparisons for 397 bp of ND5 for Gulf Killifish. Slatkin's linearized  $F_{ST}$  is above the diagonal, and Reynold's Distance is below the diagonal.

|                | Corpus Christi | Matagorda | Reitan Marsh | Sportsman's | Venice  | Ocean Springs |
|----------------|----------------|-----------|--------------|-------------|---------|---------------|
| Corpus Christi |                | 0.36160   | 0.27157      | 0.30114     | 3.75272 | 3.07884       |
| Matagorda      | 0.30866        |           | 0.00000      | 0.00000     | 0.76843 | 0.62275       |
| Reitan Marsh   | 0.24025        | 0.00000   |              | 0.00000     | 0.74154 | 0.62779       |
| Sportsman's    | 0.26324        | 0.00000   | 0.00000      |             | 0.67586 | 0.56666       |
| Venice         | 1.55872        | 0.57009   | 0.55477      | 0.51633     |         | 0.02625       |
| Ocean Springs  | 1.40581        | 0.48412   | 0.48723      | 0.44894     | 0.02591 |               |
