# Supplementary material for: Comparative Phylogeography, Historical Demography, and Population Genetics of Three Common Coastal Fauna in Spartina Marshes of the Northwestern Gulf of Mexico
Source: MDPI journal article supplement (doi:10.3390/d15060792), 2023-06-19
Supplement: s1 [file s1]

**Supplemental Table 2** Molecular indices for individual markers of *F. grandis* by sample site. *N*, No. of Sequences; *M*, No. of haplotypes, *h*, haplotypic diversity;  $\pi$ , nucleotide diversity; SD, standard deviation; *S*, No. of segregating (polymorphic) sites; *D*, Tajima's *D* neutrality test with probability value (*P*).

| Locus       | Site           | M  | <i>h</i> (SD) | $\pi$ (SD)     | S  | T <sub>s</sub> | T <sub>v</sub> | I/D |
|-------------|----------------|----|---------------|----------------|----|----------------|----------------|-----|
| <b>CR-1</b> |                |    |               |                |    |                |                |     |
|             | Corpus Christi | 11 | 0.849 (0.050) | 0.0193 (0.011) | 25 | 20             | 3              | 2   |
|             | Matagorda      | 13 | 0.954 (0.034) | 0.0209 (0.012) | 19 | 16             | 3              | 2   |
|             | Reitan Marsh   | 18 | 0.956 (0.022) | 0.0242 (0.013) | 31 | 28             | 2              | 2   |
|             | Sportsman's    | 21 | 0.977 (0.017) | 0.0220 (0.012) | 29 | 24             | 5              | 2   |
|             | Venice         | 13 | 0.757 (0.069) | 0.0068 (0.004) | 18 | 12             | 6              | 0   |
|             | Ocean Springs  | 17 | 0.843 (0.061) | 0.0097 (0.006) | 23 | 17             | 6              | 1   |
| <b>ND-2</b> |                |    |               |                |    |                |                |     |
|             | Corpus Christi | 11 | 0.895 (0.034) | 0.0153 (0.009) | 22 | 19             | 3              | 0   |
|             | Matagorda      | 13 | 0.954 (0.034) | 0.0199 (0.011) | 24 | 20             | 4              | 0   |
|             | Reitan Marsh   | 14 | 0.929 (0.025) | 0.0187 (0.010) | 23 | 22             | 1              | 0   |
|             | Sportsman's    | 17 | 0.960 (0.019) | 0.0199 (0.011) | 24 | 22             | 2              | 1   |
|             | Venice         | 8  | 0.768 (0.044) | 0.0042 (0.003) | 8  | 7              | 2              | 0   |
|             | Ocean Springs  | 17 | 0.928 (0.024) | 0.0064 (0.004) | 16 | 11             | 7              | 0   |
| <b>ND-5</b> |                |    |               |                |    |                |                |     |
|             | Corpus Christi | 14 | 0.935 (0.052) | 0.017 (0.009)  | 21 | 19             | 1              | 1   |
|             | Matagorda      | 16 | 0.909 (0.040) | 0.016 (0.009)  | 23 | 22             | 1              | 0   |
|             | Reitan Marsh   | 16 | 0.949 (0.025) | 0.017 (0.009)  | 25 | 23             | 2              | 0   |
|             | Sportsman's    | 8  | 0.598 (0.084) | 0.003 (0.002)  | 11 | 11             | 0              | 0   |
|             | Venice         | 12 | 0.722 (0.080) | 0.004 (0.003)  | 15 | 15             | 0              | 0   |
|             | Ocean Springs  | 8  | 0.769 (0.059) | 0.007 (0.004)  | 17 | 16             | 1              | 0   |
